# Supplementary material
Source: PubMed Central journal article supplement (PMC9354536)
Supplement: NIHMS1793354-supplement-Appendix_1.pdf [file NIHMS1793354-supplement-Appendix_1.pdf]

## Supplementary Appendix 1. Websites from which posts were identified

|                              |                            |                            |
|------------------------------|----------------------------|----------------------------|
| facebook.com                 | babycentre.co.uk           | yuku.com                   |
| hystersisters.com            | alzconnected.org           | podiatry-arena.com         |
| patient.co.uk                | earthclinic.com            | breastcancercare.org.uk    |
| healthunlocked.com           | alzheimers.org.uk          | marksdailyapple.com        |
| incontinentsupport.org       | abchomeopathy.com          | talkhealthpartnership.com  |
| forums.thebump.com           | msworld.org                | community.macmillan.org.uk |
| cancerforums.net             | tnation.t-nation.com       | curezone.com               |
| reddit.com                   | agingcare.com              | healthcarejourney.com      |
| pegym.com                    | susans.org                 | wdxcyber.com               |
| mumsnet.com                  | ukfibromyalgia.com         | factmed.com                |
| sparkpeople.com              | tumblr.com                 | lowcarbfriends.com         |
| med1.de                      | suboxforum.com             | thinnertimesforum.com      |
| addforums.com                | community.myfitnesspal.com | proboards.com              |
| bariatricpal.com             | community.mssociety.org.uk | rebellion.nerdfitness.com  |
| carecity.de                  | amsel.de                   |                            |
| drmcDougall.com              | bikeforums.net             |                            |
| healthcaremagic.com          | apparelyzed.com            |                            |
| dailydiapers.com             | madeformums.com            |                            |
| drhomeo.com                  | forums.psychcentral.com    |                            |
| menopausematters.co.uk       | medhelp.org                |                            |
| netmums.com                  | nomorepanic.co.uk          |                            |
| thisisms.com                 | myhandicap.ch              |                            |
| dailystrength.org            | carersuk.org               |                            |
| babycenter.com.au            | diabetes.co.uk             |                            |
| whattoexpect.com             | community.diabetes.org     |                            |
| cancer.org                   | allnurses.com              |                            |
| obesityhelp.com              | corporette.com             |                            |
| healingwell.com              | saafe.info                 |                            |
| pregnancyforum.org.uk        | sherdog.net                |                            |
| conservativeunderground.com  | welltrainedmind.com        |                            |
| ic-network.com               | Wholewomen.com             |                            |
| healthbeautymessageboard.com | medicalnewstoday.com       |                            |
| babycenter.com               | drugs.com                  |                            |
| bonesmart.org                | gransnet.com               |                            |
| answers.yahoo.com            | community.hadit.com        |                            |
| peoplespharmacy.com          | forums.phoenixrising.me    |                            |
| breastcancer.org             | empowher.com               |                            |
| ehealthforum.com             | rollercoaster.ie           |                            |
| wholewoman.com               | patientopinion.org.uk      |                            |
| la-sclerose-en-plaques.com   | scharrheds.blogspot.com    |                            |
| startingstrength.com         | soberrecovery.com          |                            |
| kitchenstewardship.com       | aapc.com                   |                            |
